# Supplementary material for: Early abstinence in severe alcohol use disorder: MCP-1 decline, choroid plexus shrinkage, and region-specific grey-matter volume changes
Source: Research Square preprint supplement (doi:10.21203/rs.3.rs-6915490/v1), 2025-06-23
Supplement: Supplementary file 1 [file 232e70b555923fc5179e78bf.docx]

**Supplementary Table 1. Results of paired t-tests for brain regions from the ASEG atlas, including uncorrected and FDR-adjusted p-values, effect sizes (Cohen’s d), volumetric differences in mm³ with 95% confidence intervals, percentage of change between T1 and T2, and the estimated sample size (N) required to detect the observed effect with 80% power at α = 0.05.**

| **Brain volume changes between T1 and T2 (ASEG atlas)** | | Uncorrected  P-values | FDR-adjusted  P-values | Effect sizes (Cohen’s d) | Estimated N to detect a difference | Difference in mm3 (95% CI) | Percentage of change |
| --- | --- | --- | --- | --- | --- | --- | --- |
| Cortical and white matter macrostructures | | | | | | | |
|  | Cerebellum white | **.022** | **.027** | .533 | - | 431 (66 to 795) | +1.6% |
|  | White matter cerebral | .111 | .111 | -.268 | 112 | - | - |
|  | Cortical gray | **.012** | **.020** | .436 | - | 5473 (1286 to 9659) | +1.4% |
|  | Cerebellum gray | **.003** | **.007** | .533 | - | 1327 (497 to 2156) | +1.6% |
|  | Subcortical gray | **.002** | **.007** | .550 | - | 1609 (633 to 2585) | +1.1% |
| Subcortical grey matter regions | | | | | | | |
|  | Thalamus | **.025** | .184 | .385 | - | 80 (10 to 149) | +0.7% |
|  | Caudate | .833 | .833 | .341 | 6441 | - | - |
|  | Putamen | .143 | .326 | -.246 | 132 | - | - |
|  | Pallidum | .588 | .676 | -.090 | 975 | - | - |
|  | Hippocampus | .266 | .425 | .186 | 230 | - | - |
|  | Accumbens area | .592 | .676 | .089 | 995 | - | - |
|  | Ventral diencephalon | **.046** | .184 | .341 | - | 51 (1 to 102) | +0.7% |
|  | Amygdala | .163 | .326 | .173 | 266 | - | - |
| Ventricular structures and choroid plexus | | | | | | | |
|  | 3d ventricle | **.044** | **.048** | -.349 | - | -24 (-47 to -0.7) | -1.7% |
|  | 4th ventricle | **.001** | **.004** | -.612 | - | -90 (-141 to -40) | -4.2% |
|  | Lateral ventricles | **.048** | **.048** | -.341 | - | -389 (-774 to -3) | -1.7% |
|  | Choroid plexus | **.043** | **.048** | -.349 | - | -98 (-192 to -3) | -2.4% |
| Corpus callosum | | | | | | | |
|  | Posterior | .329 | .548 | .163 | 299 | - | - |
|  | Mid-posterior | .588 | .588 | .090 | 975 | - | - |
|  | Central | .149 | .548 | .243 | 136 | - | - |
|  | Mid-anterior | .231 | .548 | .020 | 198 | - | - |
|  | Anterior | .283 | .588 | .091 | 950 | - | - |
