# Supplementary material for: Early abstinence in severe alcohol use disorder: MCP-1 decline, choroid plexus shrinkage, and region-specific grey-matter volume changes
Source: Research Square preprint supplement (doi:10.21203/rs.3.rs-6915490/v1), 2025-06-23
Supplement: Supplementary file 2 [file 9975fab308fb5cef903707ce.docx]

**Supplementary Table 2. Results of paired t-tests for cortical volumes based on the Desikan-Killiany atlas, including the four lobes and their sub-parcellations. The table reports uncorrected and FDR-adjusted p-values, effect sizes (Cohen’s d), volumetric differences in mm³ with 95% confidence intervals, percentage of change between T1 and T2, and the estimated sample size (N) required to detect the observed effect with 80% power at α = 0.05, where applicable.**

| **Cortical gray matter volume changes between T1 and T2 (Desikan-Killiany atlas)** | | | Uncorrected  P-values | FDR-adjusted  P-values | Effect sizes (Cohen’s d) | Estimated N to detect a difference | Difference in mm3  (95% CI) | Percentage of change |
| --- | --- | --- | --- | --- | --- | --- | --- | --- |
| Frontal lobe | | | **.021** | .**043** | .397 | - | 1936 (309 to 3563) | +1.4% |
|  | Frontal pole | | **.008** | .**044** | .465 | - | 47 (13 to 80) | +3% |
|  | Superior frontal gyrus | | **.015** | .055 | .418 | - | 488 (98 to 877) | +1.3% |
|  | Middle frontal gyrus | |  |  |  |  |  |  |
|  |  | Caudal division | **.006** | **.044** | .480 | - | 201 (61 to 340) | +2% |
|  |  | Rostral division | **.021** | .057 | .395 | - | 428 (67 to 790) | +1.7% |
|  | Inferior frontal gyrus | |  |  |  |  |  |  |
|  |  | Pars opercularis | **.029** | .063 | .369 | - | 107 (10 to 205) | +1.4% |
|  |  | Pars orbitalis | .356 | .392 | .154 | 335 | - | - |
|  |  | Pars triangularis | .090 | .142 | .287 | 98 | - | - |
|  | Orbitofrontal cortex | |  |  |  |  |  |  |
|  |  | Lateral division | .288 | .352 | .177 | 252 | - | - |
|  |  | Medial division | .453 | .453 | .125 | 508 | - | - |
|  | Paracentral lobule | | .166 | .228 | .232 | 148 | - | - |
|  | Precentral gyrus | | .067 | .122 | .311 | 84 | - | - |
| Parietal lobe | | | **.026** | **.043** | .382 |  | 1624 (204 to 3043) | +1.6% |
|  | Postcentral gyrus | | .150 | .150 | .242 | 137 | - | - |
|  | Supramarginal gyrus | | **.038** | .063 | .348 | - | 321 (13 to 630) | +1.7% |
|  | Superior parietal cortex | | **.019** | .063 | .398 | - | 390 (63 to 718) | +1.7% |
|  | Inferior parietal cortex | | .091 | .113 | .450 | 50 | - | - |
|  | Precuneus cortex | | **.036** | **.**063 | .362 | - | 295 (23 to 566) | +1.7% |
| Occipital lobe | | | **.006** | **.030** | .481 |  | 641 (197 to 1086) | +1.5% |
|  | Lingual gyrus | | .131 | .131 | .254 | 124 | - | - |
|  | Pericalcarine cortex | | **.014** | **.018** | .424 | - | 81 (17 to 145) | +2.1% |
|  | Cuneus cortex | | **.011** | **.018** | .443 | - | 71 (17 to 125) | +1.3% |
|  | Lateral occipital cortex | | **.005** | **.018** | .491 | - | 392 (126 to 659) | +2% |
| Cingulate lobe | | | .334 | .334 | .161 | 305 | - | - |
| Temporal lobe | | | .092 | .115 | .285 | 99 | - | - |
